# Supplementary material for: Evolutionary and functional analysis of the DIR gene family in Moso bamboo: insights into rapid shoot growth and stress responses
Source: Front Plant Sci. 2025 Feb 25;16:1535733. doi: 10.3389/fpls.2025.1535733 (PMC11893575; doi:10.3389/fpls.2025.1535733)
Supplement: Supplementary file 3 [file Table3.xlsx]

## Sheet: Sheet1
Table S3. DIR genes of Oryza sativa, Zea mays, and Brachypodium distachyon.
ID	Rename		ID	Rename		ID	Rename
LOC_Os01g06250.1	OsDIR01		GRMZM2G415390_P01	ZmDIR01		Bradi1g04370.1	BdDIR01
LOC_Os01g24960.1	OsDIR02		GRMZM2G433184_P01	ZmDIR02		Bradi1g04410.1	BdDIR02
LOC_Os01g25030.1	OsDIR03		GRMZM2G017629_P01	ZmDIR03		Bradi1g04420.1	BdDIR03
LOC_Os01g26340.1	OsDIR04		GRMZM2G438824_P01	ZmDIR04		Bradi1g04470.1	BdDIR04
LOC_Os03g05030.1	OsDIR05		GRMZM2G318882_P01	ZmDIR05		Bradi1g09230.1	BdDIR05
LOC_Os03g17220.1	OsDIR06		GRMZM2G472278_P01	ZmDIR06		Bradi1g20185.1	BdDIR06
LOC Os03g28190.1	OsDIR07		GRMZM2G402765_P01	ZmDIR07		Bradi1g20910.1	BdDIR07
LOC_Os03g59440.1	OsDIR08		GRMZM2G070287_P01	ZmDIR08		Bradi1g20920.1	BdDIR08
LOC_Os04g57130.1	OsDIR09		GRMZM2G112210_P03	ZmDIR09		Bradi1g20930.1	BdDIR09
LOC_Os07g01600.1	OsDIR10		GRMZM2G112210_P01	ZmDIR10		Bradi1g20940.1	BdDIR10
LOC_Os07g01620.1	OsDIR11		GRMZM2G112210_P02	ZmDIR11		Bradi1g20950.1	BdDIR11
LOC_Os07g01660.1	OsDIR12		GRMZM2G159503_P01	ZmDIR12		Bradi1g20960.1	BdDIR12
LOC_Os07g01680.1	OsDIR13		GRMZM2G178199_P01	ZmDIR13		Bradi1g20970.1	BdDIR13
LOC_Os07g42520.1	OsDIR14		GRMZM2G402417_P01	ZmDIR14		Bradi1g48292.1	BdDIR14
LOC_Os07g42570.1	OsDIR15		GRMZM2G402417_P02	ZmDIR15		Bradi1g59380.1	BdDIR15
LOC_Os07g44250.1	OsDIR16		GRMZM2G159210_P01	ZmDIR16		Bradi1g59390.1	BdDIR16
LOC_Os07g44260.1	OsDIR17		GRMZM2G097967_P01	ZmDIR17		Bradi1g59400.1	BdDIR17
LOC_Os07g44280.1	OsDIR18		AC206350.3_FGP005	ZmDIR18		Bradi1g66700.1	BdDIR18
LOC_Os07g44370.1	OsDIR19		AC215260.3_FGP001	ZmDIR19		Bradi1g70730.1	BdDIR19
LOC_Os07g44380.1	OsDIR20		GRMZM2G078667_P01	ZmDIR20		Bradi1g72860.1	BdDIR20
LOC_Os07g44450.1	OsDIR21		GRMZM2G044104_P01	ZmDIR21		Bradi2g59970.1	BdDIR21
LOC_Os07g44930.1	OsDIR22		GRMZM2G081794_P01	ZmDIR22		Bradi3g01837.1	BdDIR22
LOC_Os08g26110.1	OsDIR23		GRMZM2G129249_P01	ZmDIR23		Bradi3g08860.1	BdDIR23
LOC_Os08g26180.1	OsDIR24		GRMZM2G059706_P01	ZmDIR24		Bradi3g10430.1	BdDIR24
LOC_Os08g26560.1	OsDIR25		GRMZM2G033538_P02	ZmDIR25		Bradi3g21150.1	BdDIR25
LOC_Os08g28790.1	OsDIR26		GRMZM2G015333_P01	ZmDIR26		Bradi3g21150.2	BdDIR26
LOC_Os10g18760.1	OsDIR27		GRMZM2G002630_P01	ZmDIR27		Bradi4g03270.1	BdDIR27
LOC_Os10g18820.1	OsDIR28		GRMZM2G002630_P03	ZmDIR28		Bradi4g03270.2	BdDIR28
LOC_Os10g18870.1	OsDIR29		GRMZM2G112238_P03	ZmDIR29		Bradi4g05700.1	BdDIR29
LOC_Os10g25870.1	OsDIR30		GRMZM2G112238_P01	ZmDIR30		Bradi4g11530.1	BdDIR30
LOC_Os10g25900.1	OsDIR31		GRMZM2G112238_P04	ZmDIR31		Bradi4g11540.1	BdDIR31
LOC_Os11g07670.1	OsDIR32		GRMZM2G025959_P01	ZmDIR32		Bradi4g12340.1	BdDIR32
LOC_Os11g07680.1	OsDIR33		GRMZM2G050412_P01	ZmDIR33		Bradi4g21260.1	BdDIR33
LOC_Os11g07690.1	OsDIR34		GRMZM2G050412_P02	ZmDIR34		Bradi4g21620.1	BdDIR34
LOC_Os11g07710.1	OsDIR35		GRMZM2G163406_P01	ZmDIR35		Bradi4g22240.1	BdDIR35
LOC_Os11g07740.1	OsDIR36		GRMZM2G163406_P05	ZmDIR36		Bradi4g22250.1	BdDIR36
LOC_Os11g07770.1	OsDIR37		GRMZM2G163406_P06	ZmDIR37		Bradi4g22270.1	BdDIR37
LOC_Os11g07830.1	OsDIR38		GRMZM2G420772_P01	ZmDIR38		Bradi4g22810.1	BdDIR38
LOC_Os11g10790.1	OsDIR39		GRMZM2G420758_P01	ZmDIR39		Bradi4g24040.1	BdDIR39
LOC_Os11g10800.1	OsDIR40		GRMZM2G420743_P01	ZmDIR40		Bradi4g24110.1	BdDIR40
LOC_Os11g10820.1	OsDIR41		GRMZM2G420733_P01	ZmDIR41		Bradi4g24330.1	BdDIR41
LOC_Os11g10850.1	OsDIR42		GRMZM2G172204_P02	ZmDIR42		Bradi4g39910.1	BdDIR42
LOC_Os11g10870.1	OsDIR43		GRMZM2G172204_P01	ZmDIR43		Bradi4g39920.1	BdDIR43
LOC_Os11g27620.1	OsDIR44		GRMZM2G427073_P01	ZmDIR44		Bradi4g41300.1	BdDIR44
LOC_Os11g40180.1	OsDIR45		GRMZM2G046520_P01	ZmDIR45		Bradi4g41310.1	BdDIR45
LOC_Os11g42500.1	OsDIR46		AC205250.3_FGP006	ZmDIR46		Bradi4g41320.1	BdDIR46
LOC_Os11g42550.1	OsDIR47		GRMZM2G074611_P01	ZmDIR47		Bradi4g41330.1	BdDIR47
LOC_Os12g07580.1	OsDIR48		GRMZM2G049318_P01	ZmDIR48		Bradi4g41340.1	BdDIR48
LOC_Os12g09700.1	OsDIR49		GRMZM2G475170_P01	ZmDIR49
LOC_Os12g09720.1	OsDIR50		GRMZM2G320023_P01	ZmDIR50
LOC_Os12g12600.1	OsDIR51		GRMZM2G132273_P01	ZmDIR51
LOC_Os12g14440.1	OsDIR52		GRMZM2G084054_P01	ZmDIR52
LOC_Os12g26380.1	OsDIR53		GRMZM2G423975_P01	ZmDIR53
